# Supplementary material
Source: HighWire-hosted journal article supplement (https://cmajopen.ca/highwire/filestream/84078/field_highwire_adjunct_files/2/2020-0107-original-submission.pdf)
Supplement: 2020-0107-original-submission.pdf [file 2020-0107-original-submission.pdf]

## Cost-effectiveness of antithrombotic agents for atrial fibrillation in older adults at risk of falls

Eric KC Wong<sup>1,2</sup>

Christina Kosar<sup>2</sup>

David Naimark<sup>2,3</sup>

Sharon E Straus<sup>1,2</sup>

Harindra C Wijeyesundera<sup>2,4</sup>

1. Knowledge Translation Program, Li Ka Shing Knowledge Institute, St. Michael's Hospital, 209 Victoria Street, Toronto, Ontario, M5B 1W8, Canada
2. Institute for Health Policy Management and Evaluation, Dalla Lana School of Public Health, University of Toronto, Ontario, Canada
3. Division of Nephrology, Sunnybrook Health Sciences Centre, University of Toronto, Ontario, Canada
4. Division of Cardiology and Cardiac Surgery, Schulich Heart Centre, Sunnybrook Health Sciences Centre, University of Toronto, Ontario, Canada

**Funding:** The study had no direct funding support. Dr. Wong is supported by the Clinician Scientist Training Program at the University of Toronto, the Vanier Scholarship from the Canadian Institutes of Health Research, and the Knowledge Translation Program at St. Michael's Hospital. Dr. Straus is supported by a Tier 1 Canada Research Chair. Dr. Wijeyesundera is supported by a Phase 2 Clinician Scientist award from the Heart and Stroke Foundation of Canada, Ontario Office.

**Competing interests:** The authors have no competing interests to declare.

## Abstract (245 out of 250 words)

### Background

Atrial fibrillation (AF) is a common cardiac condition in older adults that results in an increased risk of stroke. Antithrombotic agents decrease stroke risk associated with AF but increase bleeding risk. Falls are common in older adults and increase their bleeding risk. The purpose of this study was to determine the most cost-effective anticoagulant for older adults with AF at high risk of falling.

### Methods

Using a probabilistic microsimulation Markov decision model, quality-adjusted life years (QALYs), total cost, and incremental cost-effectiveness ratios (ICERs) were calculated for each medication (ASA, warfarin, apixaban, dabigatran, rivaroxaban, and edoxaban) based on a distribution of older adults at risk of falls with atrial fibrillation. The analysis used the Ontario (Canada) public payer perspective in a lifetime horizon, and it was validated externally with published cohorts.

### Results

The most cost-effective antithrombotic therapy for atrial fibrillation in older patients at risk of falls is apixaban, with an ICER of C\$8,621 per QALY gained (5.92 QALYs at C\$94,304) over ASA. It is a dominant strategy over warfarin and other antithrombotic agents. ASA had the lowest cost (C\$86,197), but was also least effective (4.98 QALY) compared to the other medications. There was little uncertainty in the ranking with apixaban as preferred choice in 97% of model iterations.

### Interpretation

From a public payer perspective, apixaban is the most cost-effective antithrombotic in older individuals at high risk of falls. Healthcare funders should implement strategies to encourage use of the most cost-effective medication in this population.

## 1 Introduction

2 Atrial fibrillation (AF) is a common heart dysrhythmia that increases with age [1]. AF  
3 increases stroke risk due to abnormal atrial tissue substrate and stasis from contractile  
4 dysfunction [2]. Anticoagulants are used to prevent stroke in patients with AF, but these  
5 medications increase bleeding risk [3]. AF prevalence [1], stroke risk [4], and bleeding risk [5,6]  
6 all increase with age. Furthermore, older adults are often at increased risk of falling and head  
7 injury, which can lead to serious bleeding on anticoagulation [7]. The fear of causing major  
8 bleeding leads to under-prescribing of anticoagulants in older patients, particularly those with a  
9 high risk of falling [8].

10 A decision analysis study published in 1999 showed that warfarin was preferred (12.90  
11 quality-adjusted life years [QALYs]) over aspirin (11.17 QALYs) or no treatment (10.15  
12 QALYs) for AF in those at risk of falls [9]. The more recent direct oral anticoagulants (DOACs),  
13 including dabigatran, rivaroxaban, apixaban, and edoxaban, offer generally lower bleeding risk  
14 than warfarin, but similar or lower stroke risk [10]. The DOACs are economically attractive  
15 compared to warfarin in the general population [10], but how these risks apply to an older  
16 population with falls is uncertain. Older adults with AF and falls have both higher stroke and  
17 bleeding risk, so the individual risk and efficacy of the DOACs need to be evaluated in this  
18 population.

19 Decision models incorporate event probabilities, trade-offs, utilities and costs to compare  
20 costs and clinical outcomes of treatment choices for a population [11]. We used a decision model  
21 to compare warfarin, aspirin, and the four DOACs for their cost-effectiveness in older adults  
22 with AF and a high risk of falls using the Ontario, Canada public health care payer perspective.

23

## 24 Methods

### 25 Model structure

26 A health state transition (Markov) model running a two-dimensional Monte Carlo  
27 simulation (microsimulation with probabilistic sensitivity analysis [12]) was constructed in  
28 TreeAge Pro 2019 (TreeAge Software Inc., Williamstown, MA) to compare the different  
29 antithrombotic agents for atrial fibrillation. Model variables were selected from distributions  
30 (outer-loop or second-order iterations) to determine the sensitivity of model output to the fact  
31 that variable estimates are measured with a degree of uncertainty, while hypothetical patients'  
32 characteristics were simulated in inner-loop (first-order) iterations. Sampling individual patient  
33 characteristics allows the probability of transition among various health states to depend on those  
34 characteristics.

35 The analysis involved a simulated cohort of older adults with non-valvular atrial  
36 fibrillation at high risk of falls, with distributions of age, sex, stroke risk (using CHADS score  
37 [13]), bleeding risk (using HAS-BLED score [14]), and falls risk. The base case age, sex, and  
38 falls risk distributions were derived from the Tinetti falls study (Table 1) [15], which included a  
39 cohort of older adults at risk of falls. The base case CHADS and HAS-BLED scores were  
40 derived from an AF trial population [16]. The cycle length was 3 months with a life-time time  
41 horizon. Perspective of the analysis was from the public health care system third-party payer, the  
42 Ontario Ministry of Health and Long Term Care. Discounting at 1.5% was applied to both cost  
43 and utilities based on the current Canadian Agency for Drugs and Technologies in Health

1  
2  
3 44 (CADTH) guidelines [17]. Within-cycle correction was used to compensate for biases occurring  
4  
5 45 with discrete (non-random) Markov health transitions [18,19]. The results were reported in  
6  
7 46 accordance with the CHEERS statement [20].  
8  
9

10 47

## 13 48 Strategies

16 49 The strategies included the following antithrombotic options available on the Canadian  
17  
18 50 market as of January 2020:

- 21 51 1. Aspirin (ASA) <150mg daily
- 22  
23 52 2. Warfarin titrated to INR (international normalized ratio) 2–3
- 24  
25 53 3. Apixaban 5mg twice daily
- 26  
27 54 4. Dabigatran 150mg twice daily
- 28  
29 55 5. Rivaroxaban 20mg once daily
- 30  
31 56 6. Edoxaban 60mg once daily
- 32  
33  
34

35 57

37 58 Clinical practice guidelines [21,22] recommend that older adults with atrial fibrillation  
38  
39 59 should get an antithrombotic agent for stroke prophylaxis, so we did not simulate a “no  
40  
41 60 treatment” strategy.  
42  
43  
44

45 61

## 49 62 Outcomes

51  
52 63 For each inner loop iteration (simulated individual), health gains were expressed as life  
53  
54 64 years (LY) and quality-adjusted LY (QALYs), the latter to account for both survival and quality  
55  
56  
57  
58  
59  
60

1  
2  
3 65 of life, and costs were calculated as total lifetime costs. For both QALYs and costs, averages  
4  
5 66 were computed across inner-loop iterations and, in turn, grand averages were calculated by  
6  
7 67 averaging the inner loop averages across the outer loop iterations. Pairs of strategies were  
8  
9  
10 68 compared by calculating the incremental cost effectiveness ratio (ICER) as the difference in the  
11  
12 69 grand averages of costs divided by the difference in grand averages of QALYs. ICERs were  
13  
14 70 calculated by ranking all the strategies by lowest to highest cost. A pair of strategies consisted of  
15  
16 71 a given strategy and the strategy with the next lowest cost. If the option with the higher cost had  
17  
18 72 a lower effectiveness, it was considered to be directly dominated. We also considered ordered  
19  
20 73 triplets of strategies to determine extended dominance. If the effectiveness of the middle strategy  
21  
22 74 of a triplet could be achieved less expensively by a combination of the two neighboring  
23  
24 75 strategies, the middle strategy was considered to be dominated by extension. We calculated  
25  
26 76 numerical ICERs only for non-dominated strategies. The willingness-to-pay (WTP) threshold for  
27  
28 77 this analysis was set at an ICER below C\$50,000/QALY based on commonly accepted threshold  
29  
30 78 range in Canada [23,24]. Secondary outcomes included life expectancy, cumulative major stroke,  
31  
32 79 cumulative major bleeding, cumulative bedbound, and duration of time off medication.  
33  
34  
35  
36  
37  
38  
39  
40

## 41 Health states

42  
43  
44 82 A sample structure of the decision tree is shown in Figure 1. Simulated patients started in the  
45  
46 83 “alive” health state and transitioned to the others when events were encountered (Figure 2).  
47  
48 84 Stroke, bleed, and fall events were captured using tracking variables, which were used to  
49  
50 85 calculate costs and utilities.

- 51  
52  
53 86 1. **Alive:** simulated patients in the “alive” health state can transition to “bedbound” state if  
54  
55 87 they have a severe bleed or stroke, leading to severe disability with a modified Rankin

1  
2  
3 88 score of 5 [25]. Patients could also die from one of the events in the model or from other  
4  
5 89 reasons based on age-adjusted mortality rates.  
6

7  
8 90 2. **Bedbound:** patients in the “bedbound” state remained in this state until death, but they  
9  
10 91 can still experience a stroke or bleed. To simplify the model, we assumed that those who  
11  
12 92 were bedbound did not experience further falls.  
13

14  
15 93 3. **Dead:** patients who died exited the simulation.  
16

17 94  
18  
19 95 For adults with a major bleed, antithrombotics were discontinued for 3 months in the  
20  
21 96 simulation, which is a conservative duration allowing for minimal bleeding risk [26,27]. We  
22  
23 97 chose the most effective (highest) doses of each medication for the stroke prevention analysis.  
24  
25 98 Patients were assumed to be adherent to the study medication with no discontinuation, but  
26  
27 99 variation in adherence and effectiveness was accounted for in the model because the efficacy  
28  
29 100 estimates were provided as ranges.  
30

31  
32  
33 101

## 34 35 36 102 **Model probabilities, cost and utilities**

37  
38  
39 103 A targeted literature search (MEDLINE) was completed to obtain baseline probabilities  
40  
41 104 and utilities for events related to stroke, bleeding and falls (Table 2). The baseline mortality rate  
42  
43 105 for each age was derived from Statistics Canada Ontario life tables [28]. Appropriate  
44  
45 106 distributions were created for each variable for outer-loop sampling. A detailed description of the  
46  
47 107 model variables is available in the supplementary appendix S1.  
48

49  
50  
51 108 The probability of falls, stroke (major/minor), bleed (major/minor), and mortality were  
52  
53 109 derived from published trial or cohort estimates (Table 2). Drug efficacy and safety variables  
54  
55 110 were obtained from a network meta-analysis comparing all medications (Table 3) [10]. Costs  
56  
57  
58  
59  
60

1  
2  
3 111 related to falls, stroke, and bleed were derived from Canadian estimates [29,30]. Medication  
4  
5 112 costs were obtained from the Ontario Drug Benefits Formulary and local pharmacy [31]. Indirect  
6  
7 113 costs of warfarin therapy including blood monitoring and clinic visits were accounted for [32].  
8  
9 114 Cost data were adjusted for inflation to 2018 values using the Bank of Canada Consumer Price  
10  
11 115 Index [33]. Utilities were derived from published estimates. All individuals entering the cohort  
12  
13 116 began with the utility of having AF [34]. The utility of stroke or bleed was factored into the  
14  
15 117 existing utility when those events occurred. Minor stroke, minor bleed, or a fall was associated  
16  
17 118 with a disutility for a defined period of time, but not permanently.  
18  
19  
20  
21  
22  
23

## 24 120 Model Analysis

25  
26  
27  
28 121 Distributions were sampled using published point estimates along with measures of  
29  
30 122 variance. Variables that did not have variability (e.g. fixed costs) were inputted without  
31  
32 123 distributions. The simulation for each patient terminated when death occurred or when the  
33  
34 124 patient reached 100 years of age. The number of outer and inner loop iterations required for the  
35  
36 125 main analysis were determined empirically according to stability of ICER and average cost  
37  
38 126 estimates by running samples of different number of outer or inner loops while holding the other  
39  
40 127 constant. The lowest number of outer and inner loops that resulted in stable average values was  
41  
42 128 determined to be 10,000 and 5000, respectively. Residual uncertainty was explored using value  
43  
44 129 of information analysis (methods and results in Supplementary appendix S2).  
45  
46  
47  
48  
49  
50  
51  
52  
53  
54  
55  
56  
57  
58  
59  
60



## 131 Model verification and validity

132 Face validity of the model structure and outputs were evaluated by consulting experts in  
133 cardiology (HW) and geriatric medicine (SES). The model has a similar structure as a falls and  
134 anticoagulation model published in 1999 [9]. Verification was done by two programmers that  
135 independently examined the modeling steps, checked equations and reviewed TreeAge  
136 calculations to ensure accuracy. The external validity of the model was tested by comparing  
137 secondary outcomes (cumulative falls, cumulative risk of stroke) to published cohorts.  
138 Validation results are presented in Supplementary appendix S3.

139

## 140 Results

### 141 LYs, QALYs, ICERs and secondary outcomes

142 Apixaban was associated with the greatest QALY gained, at 5.92 (Table 4). In  
143 comparison, ASA had an effectiveness of 4.98 QALY. ASA had the lowest life-time cost at  
144 C\$86,197, while dabigatran had the highest cost at C\$114,762. Secondary outcomes are shown  
145 in Table 5. LY and life expectancy were both longest with apixaban and shortest with ASA (7.45  
146 vs. 6.38 LY). The proportion of patients with major stroke was lowest with dabigatran and  
147 highest with ASA (9.6% vs. 26.5%). Major bleeds occurred most frequently with dabigatran  
148 (42.8%) and least frequently with ASA (15.0%). Patients in the model spent an average of 3.49  
149 months without medication with dabigatran vs. 1.60 months with apixaban. The proportion of  
150 patients with severe physical limitation (bedbound status) due to bleed or stroke was similar

1  
2  
3 151 across the medications with lowest proportions in those receiving apixaban (2.4%) or dabigatran  
4  
5 152 (2.1%).  
6

7  
8 153 When listed by increasing life-time cost, the most economically attractive strategy was  
9  
10 154 apixaban with 5.92 QALYs, and cost of C\$94,304 and an ICER of C\$5,036 per QALY gained  
11  
12 155 compared to warfarin. Warfarin had an ICER of C\$27,088 per QALY gained compared to ASA,  
13  
14 156 and as such was extendedly dominated by apixaban (Figure 3). When warfarin was removed,  
15  
16 157 apixaban had an ICER C\$8,621 per QALY gained over ASA (Table 4). Edoxaban, rivaroxaban  
17  
18 158 and dabigatran were dominated with negative ICERs and lower QALYs compared with  
19  
20 159 apixaban.  
21  
22

23  
24 160 When variable uncertainty was explored, apixaban was the preferred strategy in 97% of  
25  
26 161 the iterations given a WTP of C\$50,000 (Figure 4). ASA was the dominant strategy if the WTP  
27  
28 162 threshold was below C\$8,621. The incremental cost-effectiveness plots show a positive trade-off  
29  
30 163 or dominance of apixaban over ASA or warfarin (Supplementary figure S2). Overall uncertainty  
31  
32 164 was progressively reduced as the WTP approached C\$50,000 (Supplementary figure S1).  
33  
34  
35

## 36 37 165 Interpretation

38  
39  
40

41 166 This health state transition model found apixaban to be the preferred strategy for stroke  
42  
43 167 prevention in older patients with AF and increased falls risk from a public payer perspective. The  
44  
45 168 overall reduction in stroke and bleeding events led to a favourable QALY despite slightly higher  
46  
47 169 lifetime costs of apixaban versus warfarin (C\$94,304 vs. C\$90,338). Apixaban had the lowest  
48  
49 170 bleeding risk of all the DOACs. Since the main consequence of frequent falling is a bleeding  
50  
51 171 event, it is clinically plausible that apixaban is most cost-effective.  
52  
53  
54  
55  
56  
57  
58  
59  
60

1  
2  
3 172 A cost-effectiveness analysis from the United Kingdom National Health Service  
4  
5 173 perspective found apixaban to be the dominant strategy for the general AF population using a  
6  
7 174 WTP threshold of £20,000 [10]. Dabigatran had a lower lifetime cost overall in that study, likely  
8  
9 175 due to the lower risk of bleeding in a population without falls risk. Although the original decision  
10  
11 176 analysis by Man-Son-Hing et al. did not include costs [9], our findings are similar in that  
12  
13  
14 177 anticoagulation is preferred over ASA.

15  
16  
17 178 Our analysis builds on prior knowledge that not only is anticoagulation warranted, but  
18  
19 179 apixaban is the most economically attractive choice for stroke prophylaxis in older patients with  
20  
21 180 AF. The model reveals little uncertainty that apixaban is the optimal choice (Figure 4). There is  
22  
23 181 little to be gained by performing more research in identifying an optimal anticoagulant for this  
24  
25 182 population (Supplementary figure S1). Rather, research should be directed to implementation of  
26  
27 183 the appropriate anticoagulant medication to this population, which will save cost and confer  
28  
29 184 greater effectiveness over the other medications.

30  
31  
32  
33 185 There are several limitations to this model. First, the model was specific to individuals  
34  
35 186 who have AF at risk of falls. Simulated patients remained at elevated fall risk throughout the  
36  
37 187 model despite the risk of falls decreasing after 12 months without a subsequent fall [48]. Second,  
38  
39 188 individuals can only fall once per cycle, and they can no longer fall once they become bedbound.  
40  
41 189 Third, patients were limited to the use of one medication in the model and assumed to be  
42  
43 190 adherent to the drug. Patients could not discontinue or transition to another medication with a  
44  
45 191 bleeding event, and medication compliance was not factored into the analysis. Finally, we only  
46  
47 192 simulated the most effective dose (based on stroke reduction) of the medication when more than  
48  
49 193 one dose was available.  
50  
51  
52  
53  
54  
55  
56  
57  
58  
59  
60

1  
2  
3 194 Our model has a number of strengths. First, the model simulated a population of older  
4  
5 195 adults at risk of falls with varying stroke and bleeding risks, in the absence of direct clinical trial  
6  
7 196 evidence in this population. The model was fully probabilistic, so reasonable variations in all the  
8  
9  
10 197 model variables were tested instead of doing sensitivity analysis in only certain variables.  
11  
12 198 Second, we used efficacy data from a recent systematic review and network meta-analysis that  
13  
14 199 compared all of the pharmacologic treatment strategies available on the Canadian market,  
15  
16 200 including ASA and warfarin. The model included the new anticoagulant edoxaban in anticipation  
17  
18 201 of ODB formulary approval. Third, we included indirect costs of warfarin therapy, including  
19  
20 202 bloodwork for monitoring and clinical visits, as well as Canadian cost estimates for falls, strokes  
21  
22 203 and bleeds. Finally, the model was validated externally using large population cohorts.  
23  
24  
25

26 204 The model provides guidance to the Ministry of Health and Long-Term Care in Ontario  
27  
28 205 for which medication is ideal for older adults with AF and falls. The last study published in 2015  
29  
30 206 showed a growing trend for apixaban and rivaroxaban prescriptions in Canada for any indication  
31  
32 207 [49], but more recent data are not publicly available. Future studies can investigate whether low-  
33  
34 208 dose (2.5mg) apixaban will reduce bleeding risk more than the standard dose (5mg) in this  
35  
36 209 population [50]. The findings from this study should be translated to policies that encourage the  
37  
38 210 use of apixaban for this population over warfarin, ASA or other DOACs.  
39  
40  
41

42 211

43  
44 212

45  
46  
47 213

1  
2  
3  
4 215 **References**

- 5 216 [1] Lloyd-Jones DM, Wang TJ, Leip EP, Larson MG, Levy D, Vasan RS, et al. Lifetime risk  
6 217 for development of atrial fibrillation: The framingham heart study. *Circulation*  
7 218 2004;110:1042–6. doi:10.1161/01.CIR.0000140263.20897.42.
- 8 219 [2] Kamel H, Okin PM, Elkind MSV, Iadecola C. Atrial Fibrillation and Mechanisms of  
9 220 Stroke: Time for a New Model. *Stroke* 2016;47:895–900.  
10 221 doi:10.1161/STROKEAHA.115.012004.
- 11 222 [3] Atrial Fibrillation Investigators. Risk Factors for Stroke and Efficacy of Antithrombotic  
12 223 Therapy in Atrial Fibrillation: Analysis of Pooled Data From Five Randomized Controlled  
13 224 Trials. *Arch Intern Med* 1994;154:1449–57. doi:10.1001/archinte.1994.00420130036007.
- 14 225 [4] Seshadri S, Beiser A, Kelly-Hayes M, Kase CS, Au R, Kannel WB, et al. The lifetime risk  
15 226 of stroke: Estimates from the framingham study. *Stroke* 2006;37:345–50.  
16 227 doi:10.1161/01.STR.0000199613.38911.b2.
- 17 228 [5] Fang MC, Go AS, Hylek EM, Chang Y, Henault LE, Jensvold NG, et al. Age and the risk  
18 229 of warfarin-associated hemorrhage: The anticoagulation and risk factors in atrial  
19 230 fibrillation study. *J Am Geriatr Soc* 2006;54:1231–6. doi:10.1111/j.1532-  
20 231 5415.2006.00828.x.
- 21 232 [6] An SJ, Kim TJ, Yoon BW. Epidemiology, risk factors, and clinical features of  
22 233 intracerebral hemorrhage: An update. *J Stroke* 2017;19:3–10. doi:10.5853/jos.2016.00864.
- 23 234 [7] Reddy S, Sharma R, Grotts J, Ferrigno L, Kaminski S. Incidence of intracranial  
24 235 hemorrhage and outcomes after ground-level falls in geriatric trauma patients taking  
25 236 preinjury anticoagulants and antiplatelet agents. *Am Surg* 2014;80:975–8.
- 26 237 [8] Sen S, Dahlberg KW. Physician’s fear of anticoagulant therapy in nonvalvular atrial  
27 238 fibrillation. *Am J Med Sci* 2014;348:513–21. doi:10.1097/MAJ.0000000000000349.
- 28 239 [9] Man-Son-Hing M, Nichol G, Lau A, Laupacis A. Choosing antithrombotic therapy for  
29 240 elderly patients with atrial fibrillation who are at risk for falls. *Arch Intern Med*  
30 241 1999;159:677–85. doi:10.1001/archinte.159.7.677.
- 31 242 [10] López-López JA, Sterne JAC, Thom HHZ, Higgins JPT, Hingorani AD, Okoli GN, et al.  
32 243 Oral anticoagulants for prevention of stroke in atrial fibrillation: Systematic review,  
33 244 network meta-Analysis, and cost effectiveness analysis. *BMJ* 2017;359.  
34 245 doi:10.1136/bmj.j5058.
- 35 246 [11] Owens DK, Whitlock EP, Henderson J, Pignone MP, Krist AH, Bibbins-Domingo K, et  
36 247 al. Use of Decision Models in the Development of Evidence-Based Clinical Preventive  
37 248 Services Recommendations: Methods of the U.S. Preventive Services Task Force. *Ann*  
38 249 *Intern Med* 2016;165:501. doi:10.7326/M15-2531.
- 39 250 [12] O’Hagan A, Stevenson M, Madan J. Monte Carlo probabilistic sensitivity analysis for  
40 251 patient level simulation models: efficient estimation of mean and variance using ANOVA.  
41 252 *Health Econ* 2007;16:1009–23. doi:10.1002/hec.1199.
- 42 253 [13] Gage BF, Waterman AD, Shannon W, Boechler M, Rich MW, Radford MJ. Validation of  
43 254 clinical classification schemes for predicting stroke: Results from the National Registry of  
44 255 Atrial Fibrillation. *J Am Med Assoc* 2001;285:2864–70. doi:10.1001/jama.285.22.2864.
- 45 256 [14] Apostolakis S, Lane DA, Guo Y, Buller H, Lip GYH. Performance of the HEMORR 2  
46 257 HAGES, ATRIA, and HAS-BLED bleeding risk-prediction scores in patients with atrial  
47 258 fibrillation undergoing anticoagulation: The AMADEUS (Evaluating the use of SR34006  
48 259 compared to warfarin or acenocoumarol in patients with atrial fibrillation) study. *J Am*  
49 260 *Coll Cardiol* 2012;60:861–7. doi:10.1016/j.jacc.2012.06.019.

- 1  
2  
3 261 [15] Tinetti ME, Speechley M, Ginter SF. Risk Factors for Falls among Elderly Persons Living  
4 262 in the Community. *N Engl J Med* 1988;319:1701–7.  
5 263 doi:10.1056/NEJM198812293192604.
- 6 264 [16] Lopes RD, Al-Khatib SM, Wallentin L, Yang H, Ansell J, Bahit MC, et al. Efficacy and  
7 265 safety of apixaban compared with warfarin according to patient risk of stroke and of  
8 266 bleeding in atrial fibrillation: A secondary analysis of a randomised controlled trial.  
9 267 *Lancet* 2012;380:1749–58. doi:10.1016/S0140-6736(12)60986-6.
- 10 268 [17] CADTH. Guidelines for the Economic Evaluation of Health Technologies: Canada, 4th  
11 269 edition. Ottawa, Canada: 2017.
- 12 270 [18] Naimark DMJ, Bott M, Krahn M. The Half-Cycle Correction Explained: Two Alternative  
13 271 Pedagogical Approaches. *Med Decis Mak* 2008;28:706–12.  
14 272 doi:10.1177/0272989X08315241.
- 15 273 [19] Naimark DMJ, Kabboul NN, Krahn MD. The Half-Cycle Correction Revisited. *Med*  
16 274 *Decis Mak* 2013;33:961–70. doi:10.1177/0272989X13501558.
- 17 275 [20] Husereau D, Drummond M, Petrou S, Carswell C, Moher D, Greenberg D, et al.  
18 276 Consolidated Health Economic Evaluation Reporting Standards (CHEERS) statement.  
19 277 *BMJ* 2013;346. doi:10.1136/bmj.f1049.
- 20 278 [21] Andrade JG, Verma A, Mitchell LB, Parkash R, Leblanc K, Atzema C, et al. 2018  
21 279 Focused Update of the Canadian Cardiovascular Society Guidelines for the Management  
22 280 of Atrial Fibrillation. *Can J Cardiol* 2018;34:1371–92. doi:10.1016/j.cjca.2018.08.026.
- 23 281 [22] Lip GYH, Banerjee A, Boriani G, Chiang C en, Fargo R, Freedman B, et al.  
24 282 Antithrombotic Therapy for Atrial Fibrillation: CHEST Guideline and Expert Panel  
25 283 Report. *Chest* 2018;154:1121–201. doi:10.1016/j.chest.2018.07.040.
- 26 284 [23] Pandey H, Paulden M, McCabe C. Theoretical models of the cost-effectiveness threshold,  
27 285 value assessment, and health care system sustainability. Edmonton, Alberta.: 2018.  
28 286 doi:978-1-926929-89-7.
- 29 287 [24] Laupacis A, Feeny D, Detsky AS, Tugwell PX. How attractive does a new technology  
30 288 have to be to warrant adoption and utilization? Tentative guidelines for using clinical and  
31 289 economic evaluations. *CMAJ* 1992;146:473–81.
- 32 290 [25] Van Swieten JC, Koudstaal PJ, Visser MC, Schouten H, Van Gijn J. Interobserver  
33 291 agreement for the assessment of handicap in stroke patients. *Stroke* 1988;19:604–7.  
34 292 doi:10.1161/01.STR.19.5.604.
- 35 293 [26] Colantino A, Jaffer AK, Brotman DJ. Resuming anticoagulation after hemorrhage: A  
36 294 practical approach. *Cleve Clin J Med* 2015;82:245–56. doi:10.3949/ccjm.82a.14047.
- 37 295 [27] Majeed A, Kim YK, Roberts RS, Holmström M, Schulman S. Optimal timing of  
38 296 resumption of warfarin after intracranial hemorrhage. *Stroke* 2010;41:2860–6.  
39 297 doi:10.1161/STROKEAHA.110.593087.
- 40 298 [28] StatCan. Life Tables, Canada, Provinces and Territories, 1980/1982 to 2014/2016. Ottawa,  
41 299 Canada: 2018.
- 42 300 [29] SMARTRISK. The Economic Burden of Injury in Canada. Toronto, Canada: 2009.
- 43 301 [30] Singh SM, Micieli A, Wijeyesundera HC. Economic evaluation of percutaneous left atrial  
44 302 appendage occlusion, dabigatran, and warfarin for stroke prevention in patients with  
45 303 nonvalvular atrial fibrillation. *Circulation* 2013;127:2414–23.  
46 304 doi:10.1161/CIRCULATIONAHA.112.000920.
- 47 305 [31] Ontario Drug Benefits Program. Ontario Drug Benefit Formulary/Comparative Drug  
48 306 Index 2019. <https://www.formulary.health.gov.on.ca/formulary/> (accessed January 9,

- 2020).
- [32] Schulman S, Anderson DR, Bungard TJ, Jaeger T, Kahn SR, Wells P, et al. Direct and indirect costs of management of long-term warfarin therapy in Canada. *J Thromb Haemost* 2010;8:2192–200. doi:10.1111/j.1538-7836.2010.03989.x.
- [33] Bank of Canada. Inflation Calculator n.d. <https://www.bankofcanada.ca/rates/related/inflation-calculator/> (accessed January 9, 2020).
- [34] Tengs TO, Wallace A. One thousand health-related quality-of-life estimates. *Med Care* 2000;38:583–637. doi:10.1097/00005650-200006000-00004.
- [35] Rao MP, Vinereanu D, Wojdyla DM, Alexander JH, Atar D, Hylek EM, et al. Clinical Outcomes and History of Fall in Patients with Atrial Fibrillation Treated with Oral Anticoagulation: Insights From the ARISTOTLE Trial. *Am J Med* 2018;131:269-275.e2. doi:10.1016/j.amjmed.2017.10.036.
- [36] Bahit MC, Lopes RD, Wojdyla DM, Held C, Hanna M, Vinereanu D, et al. Non-major bleeding with apixaban versus warfarin in patients with atrial fibrillation. *Heart* 2017;103:623–8. doi:10.1136/heartjnl-2016-309901.
- [37] Granger CB, Alexander JH, McMurray JJV, Lopes RD, Hylek EM, Hanna M, et al. Apixaban versus warfarin in patients with atrial fibrillation. *N Engl J Med* 2011;365:981–92. doi:10.1056/NEJMoa1107039.
- [38] Asuzu D, Nystrom K, Amin H, Schindler J, Wira C, Greer D, et al. Modest association between the discharge modified rankin scale score and symptomatic intracerebral hemorrhage after intravenous thrombolysis. *J Stroke Cerebrovasc Dis* 2015;24:548–53. doi:10.1016/j.jstrokecerebrovasdis.2014.09.034.
- [39] Van Staa TP, Setakis E, Di Tanna GL, Lane DA, Lip GYH. A comparison of risk stratification schemes for stroke in 79 884 atrial fibrillation patients in general practice. *J Thromb Haemost* 2011;9:39–48. doi:10.1111/j.1538-7836.2010.04085.x.
- [40] Acciarresi M, Paciaroni M, Agnelli G, Falocci N, Caso V, Becattini C, et al. Prestroke CHA2DS2-VASc Score and Severity of Acute Stroke in Patients with Atrial Fibrillation: Findings from RAF Study. *J Stroke Cerebrovasc Dis* 2017;26:1363–8. doi:10.1016/j.jstrokecerebrovasdis.2017.02.011.
- [41] Olavarria V V., Brunser A, Cabral N, Martins S, Muñoz-Venturelli P, Cavada G, et al. The distribution of the modified Rankin scale scores change according to eligibility criteria in acute ischemic stroke trials: A consideration for sample size calculations when using ordinal regression analysis. *Contemp Clin Trials Commun* 2017;5:133–6. doi:10.1016/j.conctc.2017.01.008.
- [42] Benjamin EJ, Wolf PA, D’Agostino RB, Silbershatz H, Kannel WB, Levy D. Impact of atrial fibrillation on the risk of death: The Framingham Heart Study. *Circulation* 1998;98:946–52. doi:10.1161/01.CIR.98.10.946.
- [43] De Caterina R, Connolly SJ, Pogue J, Chrolavicius S, Budaj A, Morais J, et al. Mortality predictors and effects of antithrombotic therapies in atrial fibrillation: Insights from ACTIVE-W. *Eur Heart J* 2010;31:2133–40. doi:10.1093/eurheartj/ehq250.
- [44] Eriksson M, Norrving B, Terént A, Stegmayr B. Functional outcome 3 months after stroke predicts long-term survival. *Cerebrovasc Dis* 2008;25:423–9. doi:10.1159/000121343.
- [45] Ontario Long Term Care Association. About long-term care in Ontario: Facts and figures 2019. <https://www.oltca.com/oltca/OLTCA/Public/LongTermCare/FactsFigures.aspx> (accessed January 9, 2020).

- 1  
2  
3 353 [46] Ali M, MacIsaac R, Quinn TJ, Bath PM, Veenstra DL, Xu Y, et al. Dependency and  
4 354 health utilities in stroke: Data to inform cost-effectiveness analyses. *Eur Stroke J*  
5 355 2017;2:70–6. doi:10.1177/2396987316683780.  
6  
7 356 [47] Polinder S, Boyé NDA, Mattace-Raso FUS, Van der Velde N, Hartholt KA, De Vries OJ,  
8 357 et al. Cost-utility of medication withdrawal in older fallers: results from the improving  
9 358 medication prescribing to reduce risk of FALLs (IMPROveFALL) trial. *BMC Geriatr*  
10 359 2016;16:1–10. doi:10.1186/s12877-016-0354-7.  
11 360 [48] Ganz DA, Bao Y, Shekelle PG, Rubenstein LZ. Will my patient fall? *J Am Med Assoc*  
12 361 2007;297:77–86. doi:10.1001/jama.297.1.77.  
13 362 [49] Weitz JI, Semchuk W, Turpie AGG, Fisher WD, Kong C, Ciaccia A, et al. Trends in  
14 363 Prescribing Oral Anticoagulants in Canada, 2008-2014. *Clin Ther* 2015;37:2506-2514.e4.  
15 364 doi:10.1016/j.clinthera.2015.09.008.  
16 365 [50] Sukumar S, Gulilat M, Linton B, Gryn SE, Dresser GK, Alfonsi JE, et al. Apixaban  
17 366 Concentrations with Lower than Recommended Dosing in Older Adults with Atrial  
18 367 Fibrillation. *J Am Geriatr Soc* 2019;67:1902–6. doi:10.1111/jgs.15982.  
19 368  
20  
21  
22  
23  
24  
25  
26  
27  
28  
29  
30  
31  
32  
33  
34  
35  
36  
37  
38  
39  
40  
41  
42  
43  
44  
45  
46  
47  
48  
49  
50  
51  
52  
53  
54  
55  
56  
57  
58  
59  
60



Figure 1: Model structure.

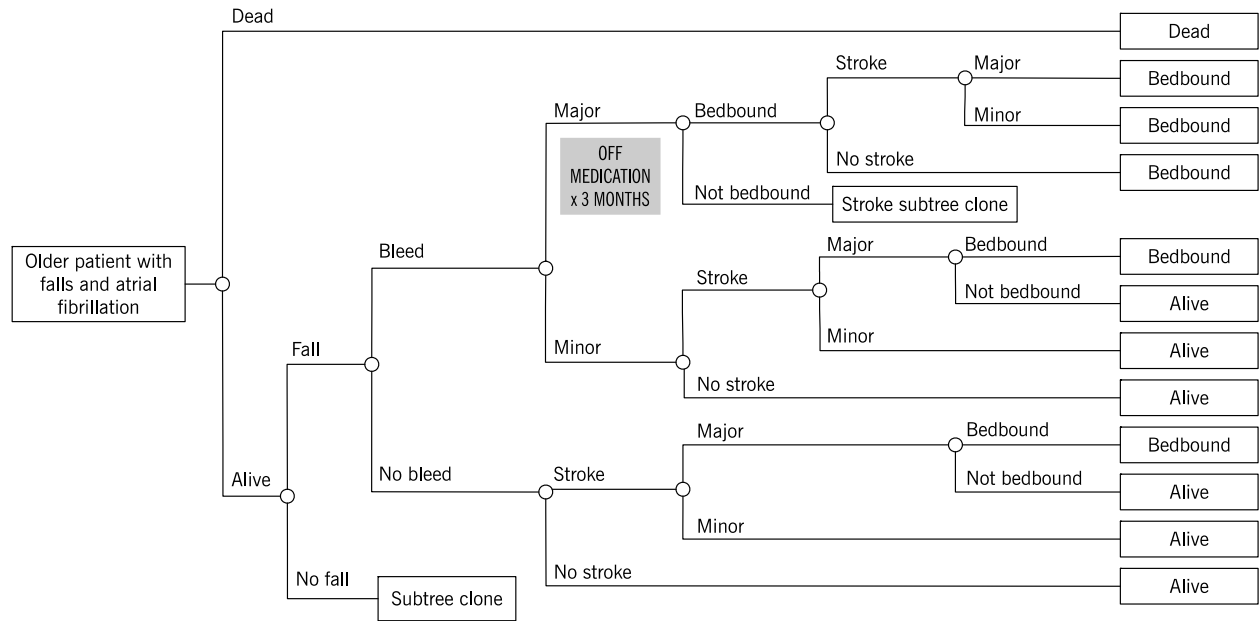

Confidential

1  
2  
3  
4  
5  
6  
7  
8  
9  
10  
11  
12  
13  
14  
15  
16  
17  
18  
19  
20  
21  
22  
23  
24  
25  
26  
27  
28  
29  
30  
31  
32  
33  
34  
35  
36  
37  
38  
39  
40  
41  
42  
43  
44  
45  
46  
47  
48  
49  
50  
51  
52  
53  
54  
55  
56  
57  
58  
59  
60

**Figure 2: Health states and possible transitions.**

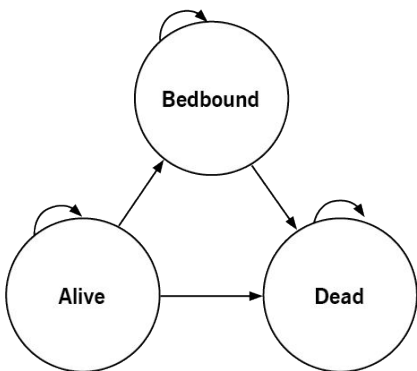

Confidential

**Figure 3: Average cost-effectiveness plane.** The cost and effectiveness of each medication were plotted. Medications that were lower in cost (y-axis) and higher in effectiveness (x-axis) were more cost-effective. Warfarin (red circle) was dominated by extension (beige line) by the combination of apixaban (asterisk) and ASA (blue circle). QALY = quality-adjusted life years.

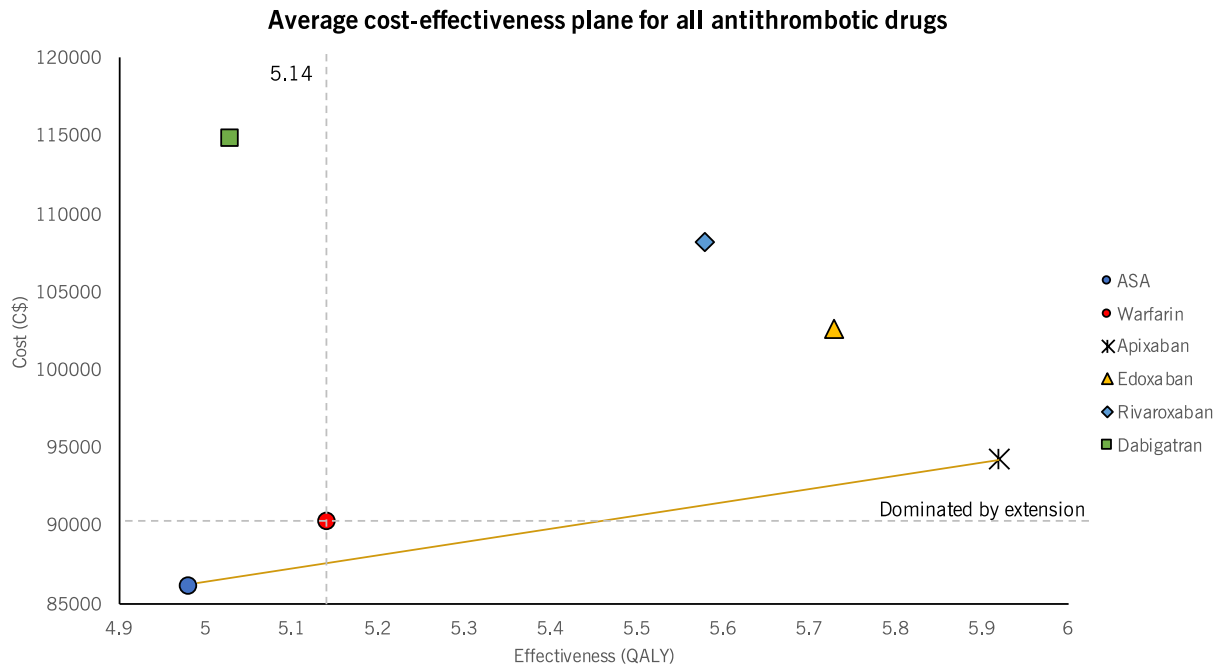

1  
2  
3  
4  
5  
6  
7  
8  
9  
10  
11  
12  
13  
14  
15  
16  
17  
18  
19  
20  
21  
22  
23  
24  
25  
26  
27  
28  
29  
30  
31  
32  
33  
34  
35  
36  
37  
38  
39  
40  
41  
42  
43  
44  
45  
46  
47  
48  
49  
50  
51  
52  
53  
54  
55  
56  
57  
58  
59  
60

**Figure 4: Cost-effectiveness acceptability curve for all antithrombotics. QALY = quality-adjusted life year.**

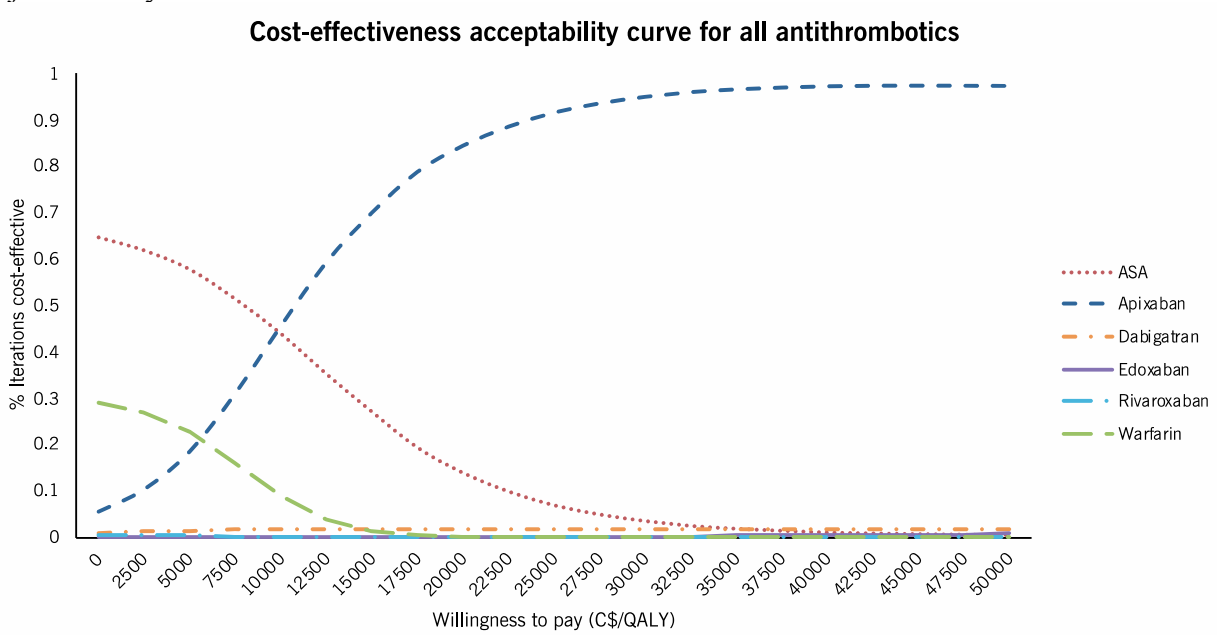

Confidential

**Table 1: Baseline characteristics simulated in the model.** SD = standard deviation, CHADS = stroke risk score, HAS-BLED = bleeding risk score.

|                         |                             |                |
|-------------------------|-----------------------------|----------------|
| Age in years, mean (SD) | 78.3 (5.1)                  |                |
| Female                  | 51%                         |                |
|                         | <b>HAS-BLED<sup>†</sup></b> |                |
| <b>CHADS*</b>           | <b>Low &lt;3</b>            | <b>High ≥3</b> |
| <b>Low &lt;3</b>        | 0.58                        | 0.19           |
| <b>High ≥3</b>          | 0.12                        | 0.11           |

\*CHADS: congestive heart failure, hypertension, age ≥75, diabetes, and stroke.

<sup>†</sup>HAS-BLED: hypertension, abnormal renal and liver function, stroke, bleeding, labile international normalized ratio, elderly (age >65), drugs or alcohol (≥8 drinks/week).

Confidential

**Table 2: Probabilities, costs and utilities for the decision model.** HR = hazard ratio, HAS-BLED† = bleeding risk score, CHADS\* = stroke risk score, OR = odds ratio.

|                                                                     | Estimate (range)              | Distribution | Reference |
|---------------------------------------------------------------------|-------------------------------|--------------|-----------|
| <b>Probabilities</b>                                                |                               |              |           |
| First fall                                                          | 0.32 (0.27–0.37)              | Beta         | [15]      |
| Subsequent fall                                                     | 0.58 (0.39–0.97)              | Beta         | [15]      |
| HR of bleed after a fall                                            | 1.39 (1.05–1.84)              | Lognormal    | [35]      |
| Any bleed – HAS-BLED low, annual                                    | 0.166 (0.111–0.221)           | Beta         | [14]      |
| Any bleed – HAS-BLED high, annual                                   | 0.091 (0.061–0.121)           | Beta         | [14]      |
| Major bleed given any anticoagulant bleed                           | 0.31 (0.25–0.46)              | Beta         | [36]      |
| Intracranial bleed given major bleed                                | 0.21 (0.14–0.28)              | Beta         | [37]      |
| Bedbound after intracranial bleed (modified Rankin scale $\geq 5$ ) | 0.176 (0.117–0.235)           | Beta         | [38]      |
| Any stroke – CHADS low                                              | 0.083 (0.055–0.111)           | LogNormal    | [39]      |
| Any stroke – CHADS high                                             | 0.037 (0.025–0.049)           | LogNormal    | [39]      |
| Major stroke given a stroke                                         | 0.41 (0.20–0.61)              | Beta         | [40]      |
| Bedbound after major stroke (modified Rankin scale $\geq 5$ )       | 0.176 (0.117–0.235)           | Beta         | [41]      |
| OR death due to atrial fibrillation                                 | 1.6 (1.2–2.2)                 | Lognormal    | [42]      |
| HR death after major stroke                                         | 5.29 (3.53–7.93)              | Lognormal    | [43]      |
| HR death after major bleed                                          | 3.35 (2.12–5.27)              | Lognormal    | [43]      |
| HR death given bedbound                                             | 3.81 (3.37–4.31)              | Lognormal    | [44]      |
| <b>Costs (CS 2018 values)</b>                                       |                               |              |           |
| Fall, single event                                                  | 7,286.01 (5,464.51–9,107.51)  | Gamma        | [29]      |
| Major bleed, initial event                                          | 5,358.98 (3,572.64–7,145.28)  | Gamma        | [30]      |
| Major bleeding, monthly                                             | 6,942.54 (4,627.99–9,255.99)  | Gamma        | [30]      |
| Minor bleed, single event                                           | 84.38 (55.89–111.78)          | Gamma        | [30]      |
| Major stroke, initial event                                         | 7,227.47 (3,613.74–14,441.79) | Gamma        | [30]      |
| Major stroke monthly                                                | 6,476.51 (4,384.7–8,768.31)   | Gamma        | [30]      |
| Minor stroke, single event                                          | 3,613.74 (500.15–7,227.47)    | Gamma        | [30]      |
| Bedbound (assume long-term care)                                    | 4,304.91 (2,869.94–5,739.88)  | Gamma        | [45]      |
| <b>Utilities/disutilities</b>                                       |                               |              |           |
| Atrial fibrillation                                                 | 0.95 (0.93–0.98)              | Beta         | [46]      |
| Fall, per event*                                                    | –0.11 (–0.08 to –0.14)        | Beta         | [47]      |
| Major bleed, long term                                              | 0.60 (0.40–0.80)              | Beta         | [34]      |
| Minor bleed, 1 month*                                               | –0.13 (–0.08 to –0.13)        | Beta         | [34]      |
| Major stroke, first year                                            | 0.26 (0.20–0.50)              | Beta         | [34]      |
| Major stroke, long term                                             | 0.71 (0.40–0.96)              | Beta         | [34]      |
| Minor stroke, first year*                                           | –0.25 (–0.15 to –0.25)        | Beta         | [34]      |
| Bedbound (Rankin $\geq 5$ )                                         | 0.14 (–0.01 to 0.29)          | Beta         | [46]      |
| *Disutilities                                                       |                               |              |           |

\*CHADS: congestive heart failure, hypertension, age  $\geq 75$ , diabetes, and stroke.

†HAS-BLED: hypertension, abnormal renal and liver function, stroke, bleeding, labile international normalized ratio, elderly (age  $>65$ ), drugs or alcohol ( $\geq 8$  drinks/week).

**Table 3: Efficacy and cost variables for antithrombotic medications.** C\$ = Canadian dollars in 2018 value.

| Compared to warfarin | Odds ratio (95% confidence interval [CI]) |                  |                  | Cost per month (C\$) |
|----------------------|-------------------------------------------|------------------|------------------|----------------------|
|                      | Any bleed                                 | Any stroke       | Death            |                      |
| ASA*                 | 0.59 (0.45–0.77)                          | 1.88 (1.40–2.51) | 1.04 (0.88–1.33) | 1.02                 |
| Apixaban*            | 0.67 (0.60–0.75)                          | 0.79 (0.66–0.94) | 0.88 (0.79–0.98) | 98.02                |
| Dabigatran*          | 1.56 (0.50–5.74)                          | 0.65 (0.52–0.81) | 0.88 (0.77–1.01) | 100.32               |
| Edoxaban*            | 0.84 (0.77–0.90)                          | 0.86 (0.74–1.01) | 0.86 (0.82–1.01) | 112.00               |
| Rivaroxaban*         | 1.03 (0.95–1.11)                          | 0.88 (0.74–1.03) | 0.83 (0.69–1.00) | 86.10                |
| Warfarin             | 1                                         | 1                | 1                | 39.45†               |
| Off medications‡     | 0.77 (0.34–1.20)                          | 1.47 (1.29–1.65) | 3.03 (2.79–3.27) | --                   |

\*Ref. [10]

‡Relative risks (95% CI). Ref. [3]

†Including cost of monitoring therapy [32]

Confidential

**Table 4: Cost-effectiveness ranking of the 6 different medications.** Warfarin is dominated by extension by the combination of ASA and apixaban, while edoxaban, rivaroxaban and dabigatran are absolutely dominated by apixaban. All values are means with 95% confidence intervals.

QALY = quality-adjusted life year, ICER = incremental cost-effectiveness ratio.

| Drug        | Cost                             | Δ Cost                        | QALY                | Δ QALY                       | ICER                                   |                |
|-------------|----------------------------------|-------------------------------|---------------------|------------------------------|----------------------------------------|----------------|
| ASA         | 86,197<br>(85,787–<br>86,607)    | -                             | 4.98<br>(4.98–4.99) | -                            | -                                      |                |
| Warfarin    | 90,338<br>(89,909–<br>90,766)    | 4,141<br>(3,548–<br>4,734)    | 5.14<br>(5.13–5.14) | 0.15<br>(0.14–0.16)          | 27,088<br>(26,495–<br>27,681)          | Ext. dominated |
| Apixaban    | 94,304<br>(93,885–<br>94,723)    | 3,966<br>(3,367–<br>4,566)    | 5.92<br>(5.92–5.93) | 0.79<br>(0.78–0.80)          | 5,036<br>(4,437–<br>5,635)             | Cost-effective |
| Edoxaban    | 102,631<br>(102,175–<br>103,088) | 8,327<br>(7,708–<br>8,947)    | 5.73<br>(5.72–5.74) | -0.19 (-0.20<br>to -0.18)    | -42,963<br>(-43,583<br>to -<br>42,343) | Abs. dominated |
| Rivaroxaban | 108,170<br>(107,645–<br>108,696) | 13,866<br>(13,194–<br>14,538) | 5.58<br>(5.57–5.59) | -0.34<br>(-0.35 to<br>-0.33) | -40,345<br>(-41,017<br>to<br>-39,673)  | Abs. dominated |
| Dabigatran  | 114,762<br>(114,108–<br>115,417) | 20,459<br>(19,682–<br>21,236) | 5.03<br>(5.02–5.04) | -0.90<br>(-0.91 to<br>-0.88) | -22,787<br>(-23,564<br>to<br>-22,010)  | Abs. dominated |



**Table 5: Life years and secondary outcomes from the model.** All values are means with 95% confidence intervals.

|             | <b>Life years<br/>(not adjusted<br/>for utility)</b> | <b>Life<br/>expectancy<br/>(years)</b> | <b>Major<br/>strokes<br/>(cumulative<br/>%)</b> | <b>Major bleeds<br/>(cumulative<br/>%)</b> | <b>Months off<br/>medication<br/>(average per<br/>patient)</b> | <b>Bedbound<br/>(cumulative<br/>%)</b> |
|-------------|------------------------------------------------------|----------------------------------------|-------------------------------------------------|--------------------------------------------|----------------------------------------------------------------|----------------------------------------|
| ASA         | 6.38<br>(6.37–6.39)                                  | 84.5<br>(84.4–84.5)                    | 26.5<br>(26.4–26.6)                             | 15.0<br>(14.9–15.0)                        | 1.19<br>(1.19–1.19)                                            | 4.8<br>(4.7–4.8)                       |
| Warfarin    | 6.65<br>(6.64–6.66)                                  | 84.7<br>(84.7–84.7)                    | 14.3<br>(14.2–14.4)                             | 25.9<br>(25.9–26.0)                        | 2.08<br>(2.08–2.09)                                            | 2.7<br>(2.7–2.7)                       |
| Apixaban    | 7.46<br>(7.45–7.47)                                  | 85.5<br>(85.5–85.5)                    | 12.7<br>(12.6–12.7)                             | 19.8<br>(19.7–19.8)                        | 1.60<br>(1.60–1.60)                                            | 2.4<br>(2.4–2.4)                       |
| Edoxaban    | 7.36<br>(7.35–7.37)                                  | 85.4<br>(85.4–85.4)                    | 13.6<br>(13.6–13.7)                             | 24.3<br>(24.2–24.3)                        | 1.97<br>(1.96–1.97)                                            | 2.6<br>(2.6–2.6)                       |
| Rivaroxaban | 7.31<br>(7.31–7.33)                                  | 85.4<br>(85.4–85.4)                    | 13.9<br>(13.8–14.0)                             | 29.4<br>(29.3–29.5)                        | 2.39<br>(2.38–2.40)                                            | 2.7<br>(2.7–2.7)                       |
| Dabigatran  | 6.87<br>(6.86–6.89)                                  | 84.9<br>(84.9–85.0)                    | 9.6<br>(9.5–9.7)                                | 42.8<br>(42.6–43.1)                        | 3.49<br>(3.47–3.51)                                            | 2.1<br>(2.0–2.1)                       |

Supplementary appendix: Cost-effectiveness of antithrombotic agents for atrial fibrillation in older adults at risk of falls

## Supplementary appendix

### Appendix S1: Model probabilities, cost and utilities

A targeted literature search (MEDLINE) was completed to obtain baseline probabilities and utilities for events related to stroke, bleeding and falls (Table S1). The baseline mortality rate for each age was derived from Statistics Canada Ontario life tables [1]. Appropriate distributions were created for each variable for outer-loop sampling.

The model utilized sampled patient characteristics and the validated CHADS2 [2] and the HAS-BLED [3] scoring tools to determine an individual's initial risks for stroke and bleeding while in the 'Alive' state. Patients were dichotomized into either high- or low-risk in both the CHADS2 and the HAS-BLED scores using  $\geq 3$  as cutoff for both scores. Four risk categories were created using the initial risk scores (main text Table 2), with proportions in each risk group determined from a published cohort [4]. In the 'Alive' state, patients could continue to cycle through with the possibility of dying, having a fall, or developing a stroke or a bleed. If they developed a stroke or bleed, it was stratified into a major or minor event. A major stroke or bleed was associated with a risk of permanent severe neurologic injury, defined by modified Rankin score of 5 [5,6]. Individuals with a Rankin score of 5 were transitioned to the bedbound health state, but they could experience further strokes and bleeds. Any stroke led to increased future stroke risk by increasing the CHAD2 category. Major bleeds also increased future bleeding risk (higher HAS-BLED score), but minor bleeds did not change the HAS-BLED status.

The probability of first and subsequent falls was based on the Tinetti falls cohort [7]. Each fall led to an increased risk of major bleeding, with a hazard ratio derived from an AF clinical trial that captured falls data [8]. The efficacy estimates (stroke, bleed, mortality odds ratios) for each medication are derived from a network meta-analysis (Table S1) [9]. The odds of bleeding, stroke and death of no treatment compared with warfarin was derived from a 1994 meta-analysis of the original warfarin trials for AF [10]. The no-treatment estimate was used during the period off medication after a major bleed.

Cost data was based on a previous decision analysis that utilized Canadian costs from 2013 [11]. We adjusted for inflation to 2018 values using the Bank of Canada Consumer Price Index [12]. Similarly, costs related to falls were obtained from a Canadian publication from 2009 and updated to 2018 values [13]. We also obtained costs of medications (main text Table 3) from the Ontario Drug Benefit Formulary (ODB) [14] and the St. Michael's Hospital (Toronto, Canada) outpatient pharmacy (personal communication). Indirect costs of warfarin therapy including blood monitoring and clinic visits were accounted for [15] with all costs being reported in Canadian dollars (C\$). The cost of the bedbound health state was defined as requiring long-term care, and the amount paid by the Ministry of Health and Long-Term Care per month was used [16].

Utilities were derived from published estimates (Table S1). All individuals entering the cohort began with the utility of having AF [17]. The utility of stroke or bleed was factored into the

Supplementary appendix: Cost-effectiveness of antithrombotic agents for atrial fibrillation in older adults at risk of falls

existing utility when those events occurred. Minor stroke, minor bleed, or a fall was associated with a disutility for a defined period of time, but not permanently.

**Table S1: Full variable set including distributions and sampling iteration.** Log normal distribution parameters were mean of logs and standard deviation of logs. IL = inner loop (first order), OL = outer loop (second order),  $\mu$  = mean,  $\sigma$  = standard deviation, HR = hazard ratio, OR = odds ratio.

|                                                                     | Sampled iterations | Distribution parameters                        | Reference |
|---------------------------------------------------------------------|--------------------|------------------------------------------------|-----------|
| <b>Baseline characteristics</b>                                     |                    |                                                |           |
| Starting age                                                        | IL                 | Normal ( $\mu=78.3$ , $\sigma=5.1$ )           | [7]       |
| Sex female                                                          | IL                 | Uniform (<0.51)                                | [7]       |
| Start CHADS/HAS-BLED profile                                        | IL                 | Uniform (0–0.58, 0.58–0.77, 0.77–0.89, 0.89–1) | [4]       |
| <b>Probabilities</b>                                                |                    |                                                |           |
| First fall                                                          | IL                 | Beta ( $\mu=0.32$ , $\sigma=0.025$ )           | [7]       |
| Subsequent fall                                                     | IL                 | Beta ( $\mu=0.58$ , $\sigma=0.097$ )           | [7]       |
| HR of bleed after a fall                                            | OL                 | LogNormal ( $\mu=0.329$ , $\sigma=0.122$ )     | [8]       |
| Any bleed – HAS-BLED low, annual                                    | IL                 | Beta ( $\mu=0.166$ , $\sigma=0.055$ )          | [3]       |
| Any bleed – HAS-BLED high, annual                                   | IL                 | Beta ( $\mu=0.091$ , $\sigma=0.030$ )          | [3]       |
| Major bleed given any anticoagulant bleed                           | OL                 | Beta ( $\mu=0.31$ , $\sigma=0.03$ )            | [18]      |
| Intracranial bleed given major bleed                                | OL                 | Beta ( $\mu=0.21$ , $\sigma=0.07$ )            | [19]      |
| Bedbound after intracranial bleed (modified Rankin scale $\geq 5$ ) | IL                 | Beta ( $\mu=0.176$ , $\sigma=0.059$ )          | [6]       |
| Any stroke – CHADS low                                              | IL                 | LogNormal ( $\mu=-3.297$ , $\sigma=0.325$ )    | [20]      |
| Any stroke – CHADS high                                             | IL                 | LogNormal ( $\mu=-2.489$ , $\sigma=0.325$ )    | [20]      |
| Major stroke given a stroke                                         | OL                 | Beta ( $\mu=0.41$ , $\sigma=0.11$ )            | [21]      |
| Bedbound after major stroke (modified Rankin scale $\geq 5$ )       | IL                 | Beta ( $\mu=0.176$ , $\sigma=0.059$ )          | [5]       |
| OR death due to atrial fibrillation                                 | OL                 | Lognormal ( $\mu=0.470$ , $\sigma=0.125$ )     | [22]      |
| HR death after major stroke                                         | OL                 | Lognormal ( $\mu=1.666$ , $\sigma=0.246$ )     | [23]      |
| HR death after major bleed                                          | OL                 | Lognormal ( $\mu=1.209$ , $\sigma=0.281$ )     | [23]      |
| HR death given bedbound                                             | OL                 | Lognormal ( $\mu=1.337$ , $\sigma=0.125$ )     | [24]      |
| <b>Costs (C\$ 2018 values)</b>                                      |                    |                                                |           |
| Fall, single event                                                  | OL                 | Gamma ( $\mu=7,286.01$ , $\sigma=2,428.67$ )   | [13]      |
| Major bleed, initial event                                          | OL                 | Gamma ( $\mu=5,358.98$ , $\sigma=1,786.33$ )   | [11]      |
| Major bleeding, monthly                                             | OL                 | Gamma ( $\mu=6,942.54$ , $\sigma=2,314.18$ )   | [11]      |
| Minor bleed, single event                                           | OL                 | Gamma ( $\mu=84.38$ , $\sigma=28.13$ )         | [11]      |
| Major stroke, initial event                                         | OL                 | Gamma ( $\mu=7,227.47$ , $\sigma=2,409.16$ )   | [11]      |
| Major stroke monthly                                                | OL                 | Gamma ( $\mu=6,476.51$ , $\sigma=2,158.84$ )   | [11]      |
| Minor stroke, single event                                          | OL                 | Gamma ( $\mu=3,613.74$ , $\sigma=1,204.58$ )   | [11]      |
| Bedbound (assume long-term care)                                    | OL                 | Gamma ( $\mu=4,304.91$ , $\sigma=1,434.97$ )   | [16]      |
| <b>Utilities/disutilities</b>                                       |                    |                                                |           |
| Atrial fibrillation                                                 | IL                 | Beta ( $\mu=0.95$ , $\sigma=0.02$ )            | [25]      |
| Fall, per event*                                                    | IL                 | Beta ( $\mu=-0.11$ , $\sigma=0.04$ )           | [26]      |
| Major bleed, long term                                              | IL                 | Beta ( $\mu=0.31$ , $\sigma=0.03$ )            | [17]      |
| Minor bleed, 1 month*                                               | IL                 | Beta ( $\mu=0.21$ , $\sigma=0.07$ )            | [17]      |
| Major stroke, first year                                            | IL                 | Beta ( $\mu=0.176$ , $\sigma=0.059$ )          | [17]      |
| Major stroke, long term                                             | IL                 | LogNormal ( $\mu=-3.297$ , $\sigma=0.325$ )    | [17]      |
| Minor stroke, first year*                                           | IL                 | LogNormal ( $\mu=-2.489$ , $\sigma=0.325$ )    | [17]      |
| Bedbound (Rankin $\geq 5$ )                                         | IL                 | Beta ( $\mu=0.41$ , $\sigma=0.11$ )            | [25]      |
| *Disutilities                                                       |                    |                                                |           |

Supplementary appendix: Cost-effectiveness of antithrombotic agents for atrial fibrillation in older adults at risk of falls

| <b>Drug efficacy and safety</b> |    |                                             |      |
|---------------------------------|----|---------------------------------------------|------|
| ASA, OR any bleed               | OL | LogNormal ( $\mu=-0.528$ , $\sigma=0.137$ ) | [9]  |
| ASA, OR any stroke              | OL | LogNormal ( $\mu=0.631$ , $\sigma=0.149$ )  | [9]  |
| ASA, OR death                   | OL | LogNormal ( $\mu=0.039$ , $\sigma=0.105$ )  | [9]  |
| Apixaban, OR any bleed          | OL | LogNormal ( $\mu=-0.400$ , $\sigma=0.057$ ) | [9]  |
| Apixaban, OR any stroke         | OL | LogNormal ( $\mu=-0.236$ , $\sigma=0.090$ ) | [9]  |
| Apixaban, OR death              | OL | LogNormal ( $\mu=-0.128$ , $\sigma=0.055$ ) | [9]  |
| Dabigatran, OR any bleed        | OL | LogNormal ( $\mu=0.445$ , $\sigma=0.623$ )  | [9]  |
| Dabigatran, OR any stroke       | OL | LogNormal ( $\mu=-0.431$ , $\sigma=0.113$ ) | [9]  |
| Dabigatran, OR death            | OL | LogNormal ( $\mu=-0.128$ , $\sigma=0.069$ ) | [9]  |
| Edoxaban, OR any bleed          | OL | LogNormal ( $\mu=-0.174$ , $\sigma=0.040$ ) | [9]  |
| Edoxaban, OR any stroke         | OL | LogNormal ( $\mu=-0.151$ , $\sigma=0.079$ ) | [9]  |
| Edoxaban, OR death              | OL | LogNormal ( $\mu=-0.151$ , $\sigma=0.053$ ) | [9]  |
| Rivaroxaban, OR any bleed       | OL | LogNormal ( $\mu=0.030$ , $\sigma=0.040$ )  | [9]  |
| Rivaroxaban, OR any stroke      | OL | LogNormal ( $\mu=-0.128$ , $\sigma=0.084$ ) | [9]  |
| Rivaroxaban, OR death           | OL | LogNormal ( $\mu=-0.186$ , $\sigma=0.095$ ) | [9]  |
| Off medication, OR any bleed    | OL | LogNormal ( $\mu=-0.262$ , $\sigma=0.325$ ) | [10] |
| Off medication, OR any stroke   | OL | LogNormal ( $\mu=0.386$ , $\sigma=0.117$ )  | [10] |
| Off medication, OR death        | OL | LogNormal ( $\mu=1.109$ , $\sigma=0.443$ )  | [10] |

Confidential

Supplementary appendix: Cost-effectiveness of antithrombotic agents for atrial fibrillation in older adults at risk of falls

## Appendix S2: Value of information (VOI) analysis

Residual uncertainty of the model was explored using VOI analysis [27]. The expected value with perfect information (EVPI) is derived from the difference of the model estimate and expected values with no uncertainty (perfect information). The EVPI was plotted against willingness to pay (WTP) in Figure S1. EVPI gives an estimate of opportunity costs (potentially lost costs) with the current level of evidence. If the cost of new evidence is less than the EVPI, then studies should be done to further reduce uncertainty in the model. In this model, the EVPI progressively decreases to near 0 as WTP approaches C\$50,000/QALY, suggesting that there is minimal uncertainty with the results found.

**Figure S1: Expected value with perfect information (EVPI) vs. willingness-to-pay (WTP).**

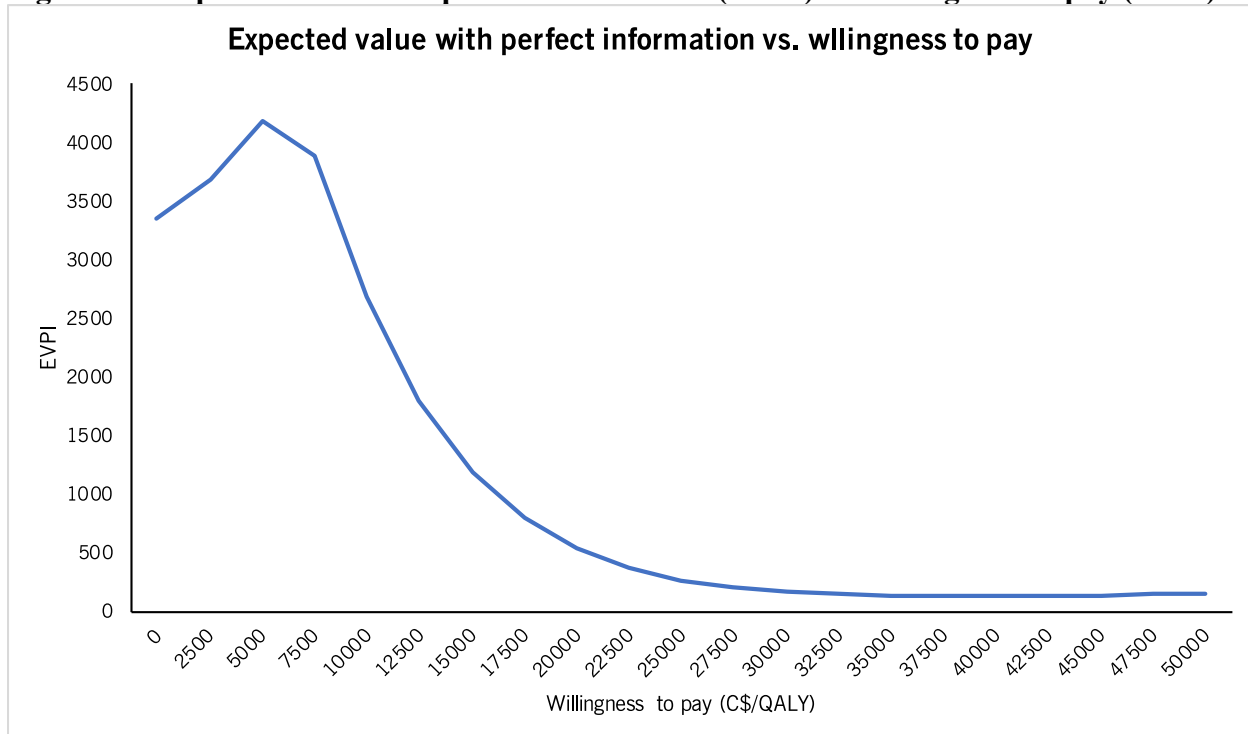

Supplementary appendix: Cost-effectiveness of antithrombotic agents for atrial fibrillation in older adults at risk of falls

**Figure S2: Incremental cost-effectiveness plots for (A) apixaban vs. ASA and (B) apixaban vs. warfarin.**

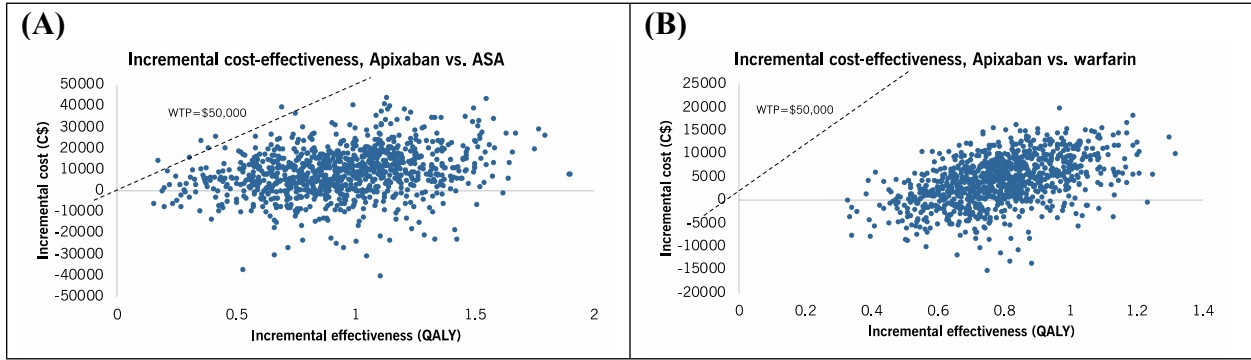

Confidential

Supplementary appendix: Cost-effectiveness of antithrombotic agents for atrial fibrillation in older adults at risk of falls

### Appendix S3: Model validation results

Using the prespecified variables, the model was shown to be externally valid. The cumulative number of falls in the model was 4.17 (95% confidence interval, CI 3.41–4.94) compared with 3.59 in a United States population-based cohort [28] and 6.57 in a Finnish geriatric community-dwelling cohort [29]. The cumulative number of falls was determined by multiplying the annual falls rate by the average life years from the model. The cumulative stroke risk in the model with ASA is 0.26 (0.13–0.40). The Framingham cohort estimates the cumulative stroke risk from age 75 to be 0.104 [30]. Adjusting for the presence of AF (relative risk, RR 3.3 from the Framingham cohort [31]) and the risk reduction with ASA (RR 0.64 [10]), the cumulative stroke risk is 0.22, which is similar to the model estimate. No calibration was required.

Confidential

Supplementary appendix: Cost-effectiveness of antithrombotic agents for atrial fibrillation in older adults at risk of falls

## References

- [1] StatCan. Life Tables, Canada, Provinces and Territories, 1980/1982 to 2014/2016. Ottawa, Canada: 2018.
- [2] Gage BF, Waterman AD, Shannon W, Boehler M, Rich MW, Radford MJ. Validation of clinical classification schemes for predicting stroke: Results from the National Registry of Atrial Fibrillation. *J Am Med Assoc* 2001;285:2864–70. doi:10.1001/jama.285.22.2864.
- [3] Apostolakis S, Lane DA, Guo Y, Buller H, Lip GYH. Performance of the HEMORR 2 HAGES, ATRIA, and HAS-BLED bleeding risk-prediction scores in patients with atrial fibrillation undergoing anticoagulation: The AMADEUS (Evaluating the use of SR34006 compared to warfarin or acenocoumarol in patients with atrial fibrillation) study. *J Am Coll Cardiol* 2012;60:861–7. doi:10.1016/j.jacc.2012.06.019.
- [4] Lopes RD, Al-Khatib SM, Wallentin L, Yang H, Ansell J, Bahit MC, et al. Efficacy and safety of apixaban compared with warfarin according to patient risk of stroke and of bleeding in atrial fibrillation: A secondary analysis of a randomised controlled trial. *Lancet* 2012;380:1749–58. doi:10.1016/S0140-6736(12)60986-6.
- [5] Olavarria V V., Brunser A, Cabral N, Martins S, Muñoz-Venturelli P, Cavada G, et al. The distribution of the modified Rankin scale scores change according to eligibility criteria in acute ischemic stroke trials: A consideration for sample size calculations when using ordinal regression analysis. *Contemp Clin Trials Commun* 2017;5:133–6. doi:10.1016/j.conctc.2017.01.008.
- [6] Asuzu D, Nystrom K, Amin H, Schindler J, Wira C, Greer D, et al. Modest association between the discharge modified rankin scale score and symptomatic intracerebral hemorrhage after intravenous thrombolysis. *J Stroke Cerebrovasc Dis* 2015;24:548–53. doi:10.1016/j.jstrokecerebrovasdis.2014.09.034.
- [7] Tinetti ME, Speechley M, Ginter SF. Risk Factors for Falls among Elderly Persons Living in the Community. *N Engl J Med* 1988;319:1701–7. doi:10.1056/NEJM198812293192604.
- [8] Rao MP, Vinereanu D, Wojdyla DM, Alexander JH, Atar D, Hylek EM, et al. Clinical Outcomes and History of Fall in Patients with Atrial Fibrillation Treated with Oral Anticoagulation: Insights From the ARISTOTLE Trial. *Am J Med* 2018;131:269-275.e2. doi:10.1016/j.amjmed.2017.10.036.
- [9] López-López JA, Sterne JAC, Thom HHZ, Higgins JPT, Hingorani AD, Okoli GN, et al. Oral anticoagulants for prevention of stroke in atrial fibrillation: Systematic review, network meta-Analysis, and cost effectiveness analysis. *BMJ* 2017;359. doi:10.1136/bmj.j5058.
- [10] Atrial Fibrillation Investigators. Risk Factors for Stroke and Efficacy of Antithrombotic Therapy in Atrial Fibrillation: Analysis of Pooled Data From Five Randomized Controlled Trials. *Arch Intern Med* 1994;154:1449–57. doi:10.1001/archinte.1994.00420130036007.
- [11] Singh SM, Micieli A, Wijeyesundera HC. Economic evaluation of percutaneous left atrial appendage occlusion, dabigatran, and warfarin for stroke prevention in patients with nonvalvular atrial fibrillation. *Circulation* 2013;127:2414–23. doi:10.1161/CIRCULATIONAHA.112.000920.
- [12] Bank of Canada. Inflation Calculator n.d. <https://www.bankofcanada.ca/rates/related/inflation-calculator/> (accessed January 9, 2020).
- [13] SMARTRISK. The Economic Burden of Injury in Canada. Toronto, Canada: 2009.



Supplementary appendix: Cost-effectiveness of antithrombotic agents for atrial fibrillation in older adults at risk of falls

- [14] Ontario Drug Benefits Program. Ontario Drug Benefit Formulary/Comparative Drug Index 2019. <https://www.formulary.health.gov.on.ca/formulary/> (accessed January 9, 2020).
- [15] Schulman S, Anderson DR, Bungard TJ, Jaeger T, Kahn SR, Wells P, et al. Direct and indirect costs of management of long-term warfarin therapy in Canada. *J Thromb Haemost* 2010;8:2192–200. doi:10.1111/j.1538-7836.2010.03989.x.
- [16] Ontario Long Term Care Association. About long-term care in Ontario: Facts and figures 2019. <https://www.oltca.com/oltca/OLTCA/Public/LongTermCare/FactsFigures.aspx> (accessed January 9, 2020).
- [17] Tengs TO, Wallace A. One thousand health-related quality-of-life estimates. *Med Care* 2000;38:583–637. doi:10.1097/00005650-200006000-00004.
- [18] Bahit MC, Lopes RD, Wojdyla DM, Held C, Hanna M, Vinereanu D, et al. Non-major bleeding with apixaban versus warfarin in patients with atrial fibrillation. *Heart* 2017;103:623–8. doi:10.1136/heartjnl-2016-309901.
- [19] Granger CB, Alexander JH, McMurray JJV, Lopes RD, Hylek EM, Hanna M, et al. Apixaban versus warfarin in patients with atrial fibrillation. *N Engl J Med* 2011;365:981–92. doi:10.1056/NEJMoa1107039.
- [20] Van Staa TP, Setakis E, Di Tanna GL, Lane DA, Lip GYH. A comparison of risk stratification schemes for stroke in 79 884 atrial fibrillation patients in general practice. *J Thromb Haemost* 2011;9:39–48. doi:10.1111/j.1538-7836.2010.04085.x.
- [21] Acciarresi M, Paciaroni M, Agnelli G, Falocci N, Caso V, Becattini C, et al. Prestroke CHA2DS2-VASc Score and Severity of Acute Stroke in Patients with Atrial Fibrillation: Findings from RAF Study. *J Stroke Cerebrovasc Dis* 2017;26:1363–8. doi:10.1016/j.jstrokecerebrovasdis.2017.02.011.
- [22] Benjamin EJ, Wolf PA, D’Agostino RB, Silbershatz H, Kannel WB, Levy D. Impact of atrial fibrillation on the risk of death: The Framingham Heart Study. *Circulation* 1998;98:946–52. doi:10.1161/01.CIR.98.10.946.
- [23] De Caterina R, Connolly SJ, Pogue J, Chrolavicius S, Budaj A, Morais J, et al. Mortality predictors and effects of antithrombotic therapies in atrial fibrillation: Insights from ACTIVE-W. *Eur Heart J* 2010;31:2133–40. doi:10.1093/eurheartj/ehq250.
- [24] Eriksson M, Norrving B, Terént A, Stegmayr B. Functional outcome 3 months after stroke predicts long-term survival. *Cerebrovasc Dis* 2008;25:423–9. doi:10.1159/000121343.
- [25] Ali M, MacIsaac R, Quinn TJ, Bath PM, Veenstra DL, Xu Y, et al. Dependency and health utilities in stroke: Data to inform cost-effectiveness analyses. *Eur Stroke J* 2017;2:70–6. doi:10.1177/2396987316683780.
- [26] Polinder S, Boyé NDA, Mattace-Raso FUS, Van der Velde N, Hartholt KA, De Vries OJ, et al. Cost-utility of medication withdrawal in older fallers: results from the improving medication prescribing to reduce risk of FALLs (IMPROveFALL) trial. *BMC Geriatr* 2016;16:1–10. doi:10.1186/s12877-016-0354-7.
- [27] Wilson ECF. A Practical Guide to Value of Information Analysis. *Pharmacoeconomics* 2015;33:105–21. doi:10.1007/s40273-014-0219-x.
- [28] Verma SK, Willetts JL, Corns HL, Marucci-Wellman HR, Lombardi DA, Courtney TK. Falls and fall-related injuries among community-dwelling adults in the United States. *PLoS One* 2016;11. doi:10.1371/journal.pone.0150939.
- [29] Iinattiniemi S, Jokelainen J, Luukinen H. Falls risk among a very old home-dwelling population. *Scand J Prim Health Care* 2009;27:25–30. doi:10.1080/02813430802588683.

Supplementary appendix: Cost-effectiveness of antithrombotic agents for atrial fibrillation in older adults at risk of falls

- [30] Seshadri S, Beiser A, Kelly-Hayes M, Kase CS, Au R, Kannel WB, et al. The lifetime risk of stroke: estimates from the Framingham Study. *Stroke* 2006;37:345–50. doi:10.1161/01.STR.0000199613.38911.b2.
- [31] Wolf PA, Abbott RD, Kannel WB. Atrial fibrillation as an independent risk factor for stroke: The framingham study. *Stroke* 1991;22:983–8. doi:10.1161/01.STR.22.8.983.

Confidential
